# Supplementary material for: Models for predicting venous thromboembolism in ambulatory patients with lung cancer: a systematic review protocol
Source: PubMed Central journal article supplement — BMJ Open. 2021 Dec 1;11(12):e055322. doi: 10.1136/bmjopen-2021-055322 (PMC8638451; doi:10.1136/bmjopen-2021-055322), 2021-12-01
Supplement: bmjopen-2021-055322.draft_revisions.pdf [file bmjopen-2021-055322.draft_revisions.pdf]

# BMJ Open

BMJ Open is committed to open peer review. As part of this commitment we make the peer review history of every article we publish publicly available.

When an article is published we post the peer reviewers' comments and the authors' responses online. We also post the versions of the paper that were used during peer review. These are the versions that the peer review comments apply to.

The versions of the paper that follow are the versions that were submitted during the peer review process. They are not the versions of record or the final published versions. They should not be cited or distributed as the published version of this manuscript.

BMJ Open is an open access journal and the full, final, typeset and author-corrected version of record of the manuscript is available on our site with no access controls, subscription charges or pay-per-view fees (<http://bmjopen.bmj.com>).

If you have any questions on BMJ Open's open peer review process please email [info.bmjopen@bmj.com](mailto:info.bmjopen@bmj.com)

# BMJ Open

## Models for predicting venous thromboembolism in ambulatory patients with lung cancer: a systematic review protocol

|                               |                                                                                                                                                                                                                                                                                                                                                                                                                                                                                                                                                                                                                                                                                                                                                                                      |
|-------------------------------|--------------------------------------------------------------------------------------------------------------------------------------------------------------------------------------------------------------------------------------------------------------------------------------------------------------------------------------------------------------------------------------------------------------------------------------------------------------------------------------------------------------------------------------------------------------------------------------------------------------------------------------------------------------------------------------------------------------------------------------------------------------------------------------|
| Journal:                      | <i>BMJ Open</i>                                                                                                                                                                                                                                                                                                                                                                                                                                                                                                                                                                                                                                                                                                                                                                      |
| Manuscript ID                 | bmjopen-2021-055322                                                                                                                                                                                                                                                                                                                                                                                                                                                                                                                                                                                                                                                                                                                                                                  |
| Article Type:                 | Protocol                                                                                                                                                                                                                                                                                                                                                                                                                                                                                                                                                                                                                                                                                                                                                                             |
| Date Submitted by the Author: | 08-Jul-2021                                                                                                                                                                                                                                                                                                                                                                                                                                                                                                                                                                                                                                                                                                                                                                          |
| Complete List of Authors:     | Yan, Ann-Rong; University of Canberra Faculty of Health, School of Health Sciences<br>Samarawickrema, Indira; University of Canberra Faculty of Health, School of Nursing, Midwifery and Public Health<br>Naunton, Mark; University of Canberra Faculty of Health, School of Health Sciences<br>Peterson, Gregory; University of Canberra Faculty of Health, School of Health Sciences; University of Tasmania College of Health and Medicine<br>Yip, Desmond; University of Canberra Faculty of Health, School of Health Sciences; Canberra Hospital, Department of Medical Oncology<br>Mortazavi, Reza; University of Canberra Faculty of Health, School of Health Sciences; University of Canberra Faculty of Health, Prehab Activity Cancer Exercise Survivorship research group |
| Keywords:                     | Respiratory tract tumours < THORACIC MEDICINE, Thromboembolism < CARDIOLOGY, Anticoagulation < HAEMATOLOGY                                                                                                                                                                                                                                                                                                                                                                                                                                                                                                                                                                                                                                                                           |
|                               |                                                                                                                                                                                                                                                                                                                                                                                                                                                                                                                                                                                                                                                                                                                                                                                      |

SCHOLARONE™  
Manuscripts

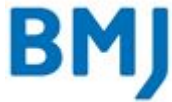

I, the Submitting Author has the right to grant and does grant on behalf of all authors of the Work (as defined in the below author licence), an exclusive licence and/or a non-exclusive licence for contributions from authors who are: i) UK Crown employees; ii) where BMJ has agreed a CC-BY licence shall apply, and/or iii) in accordance with the terms applicable for US Federal Government officers or employees acting as part of their official duties; on a worldwide, perpetual, irrevocable, royalty-free basis to BMJ Publishing Group Ltd ("BMJ") its licensees and where the relevant Journal is co-owned by BMJ to the co-owners of the Journal, to publish the Work in this journal and any other BMJ products and to exploit all rights, as set out in our [licence](#).

The Submitting Author accepts and understands that any supply made under these terms is made by BMJ to the Submitting Author unless you are acting as an employee on behalf of your employer or a postgraduate student of an affiliated institution which is paying any applicable article publishing charge ("APC") for Open Access articles. Where the Submitting Author wishes to make the Work available on an Open Access basis (and intends to pay the relevant APC), the terms of reuse of such Open Access shall be governed by a Creative Commons licence – details of these licences and which [Creative Commons](#) licence will apply to this Work are set out in our licence referred to above.

Other than as permitted in any relevant BMJ Author's Self Archiving Policies, I confirm this Work has not been accepted for publication elsewhere, is not being considered for publication elsewhere and does not duplicate material already published. I confirm all authors consent to publication of this Work and authorise the granting of this licence.

# Models for predicting venous thromboembolism in ambulatory patients with lung cancer: a systematic review protocol

Ann-Rong Yan <sup>1</sup>, Indira Samarawickrema <sup>2</sup>, Mark Naunton <sup>1</sup>, Gregory M. Peterson <sup>1,3</sup>, Desmond Yip <sup>1,4</sup>, and Reza Mortazavi <sup>1,5\*</sup>

- <sup>1</sup> School of Health Sciences, Faculty of Health, University of Canberra, Canberra, ACT, Australia; [ann-rong.yan@canberra.edu.au](mailto:ann-rong.yan@canberra.edu.au) (A-RY); [mark.naunton@canberra.edu.au](mailto:mark.naunton@canberra.edu.au) (MN); [g.peterson@utas.edu.au](mailto:g.peterson@utas.edu.au) (GMP); [desmond.yip@anu.edu.au](mailto:desmond.yip@anu.edu.au) (DY); [reza.mortazavi@canberra.edu.au](mailto:reza.mortazavi@canberra.edu.au) (RM)
  - <sup>2</sup> School of Nursing, Midwifery and Public Health, Faculty of Health, University of Canberra, Canberra, ACT, Australia; [Indira.Samarawickrema@canberra.edu.au](mailto:Indira.Samarawickrema@canberra.edu.au)
  - <sup>3</sup> College of Health and Medicine, University of Tasmania, TAS, Australia
  - <sup>4</sup> Department of Medical Oncology, The Canberra Hospital, Garran, ACT, Australia
  - <sup>5</sup> Prehab Activity Cancer Exercise Survivorship research group, Faculty of Health, University of Canberra, Canberra, ACT, Australia
- \* Correspondence: [reza.mortazavi@canberra.edu.au](mailto:reza.mortazavi@canberra.edu.au)

Word count: 2113

## ABSTRACT

**Introduction:** Venous thromboembolism (VTE) is a common complication in patients with cancer and has a determining role in the disease prognosis. The risk is significantly increased with certain types of cancer, such as lung cancer. Partly due to difficulties in managing haemorrhage in outpatient settings, anticoagulant prophylaxis is only recommended for ambulatory patients at high risk of VTE. This requires a precise VTE risk assessment in individual patients. Although VTE risk assessment models have been developed and updated in recent years, there are conflicting reports on the effectiveness of such risk prediction models in patient management. The aim of this systematic review is to gain a better understanding of the available VTE risk assessment tools for ambulatory patients with lung cancer and compare their predictive performance.

**Methods and analysis:** A systematic review will be conducted using Medline, Cochrane Library, CINAHL, Embase, and Web of Science databases from inception to current time, to identify all VTE risk prediction models which have included adult ambulatory patients with primary lung cancer for model development and/or validation. Two independent reviewers will conduct article screening, study selection, data extraction and quality assessment of the primary studies. Any disagreements will be referred to a third researcher to resolve. The included studies will be assessed for risk of bias and applicability. The CheckList for critical Appraisal and data extraction for systematic Reviews of prediction Modelling Studies (CHARMS) will be used for data extraction and appraisal. Data from similar studies will be used for meta-analysis to determine the incidence of VTE and the performance of the risk models.

**Ethics and dissemination:** Ethics approval is waived for this research since the study is carried out on published papers. We will disseminate the results in a peer-reviewed journal.

**Keywords:** thromboembolism; respiratory tract tumours; anticoagulant

**PROSPERO registration number:** CRD42021245907

### Strengths and limitations of this study

- To the best of our knowledge, this is the first systematic review of VTE risk assessment models for use in ambulatory patients with lung cancer.
- There will likely be heterogeneity among the included studies due to differences in study populations, research methods, anti-cancer treatments, and the follow-up periods.
- The restriction to use articles published in English may introduce some bias.

## INTRODUCTION

Lung cancer is the second most common type of cancer globally, and it has the highest mortality rate among all cancers.<sup>1</sup> Cancer is a risk factor for venous thromboembolism (VTE) and the incidence of VTE varies with the histological type, stage and aggressiveness of the cancer.<sup>2</sup> In lung cancer patients receiving chemotherapy, the incidence of VTE during a median follow-up period of 12 months was reported to be as high as 13.9%.<sup>3</sup> It has been reported that having VTE is a significant predictor of death within two years in patients with primary lung cancer, with hazard ratios of 2.3 (95% CI 2.2-2.4) and 1.5 (95% CI 1.3-1.7) for non-small cell lung cancer (NSCLC) and small cell lung cancer (SCLC), respectively.<sup>4</sup>

The current American Society of Clinical Oncology (ASCO) Clinical Practice Guidelines for Venous Thromboembolism Prophylaxis and Treatment in Patients With Cancer, only recommend thromboprophylaxis in patients whose risk of developing VTE has been assessed as high using a VTE risk prediction model called the Khorana score.<sup>5</sup>

The Khorana Score was developed in 2008 for predicting VTE risk in ambulatory cancer patients receiving chemotherapy.<sup>6</sup> It uses the following five items: cancer site, platelet count, leucocyte count, haemoglobin level, and body mass index (BMI). In using this scoring tool, 2 points are allocated to very high-risk cancers (e.g. stomach and pancreas), 1 point is given for high-risk cancers (e.g. lung, lymphoma, gynaecological, bladder, testicular), 1 point for baseline platelet count  $\geq 350 \times 10^9/L$ , 1 point for baseline leukocyte count  $> 11 \times 10^9/L$ , 1 point for baseline haemoglobin level  $< 100 \text{ g/L}$  or use of erythropoietin, and 1 point for BMI  $\geq 35 \text{ kg/m}^2$ .<sup>6</sup> In the original risk model, a total score of 0 indicates a low risk, a total score of 1 to 2 suggests an intermediate risk, and a score of 3 or more indicates a high-risk situation.<sup>6</sup> Recently, a different cut-off score of 2 was used to stratify high-risk groups in two randomised controlled trials of anticoagulant thromboprophylaxis.<sup>7,8</sup>

An external validation study undertaken by Haltout *et al.* on solid tumours reported a high specificity of 92.8% (95% CI 91.5%-94.0%), but a poor sensitivity of 29.3% (95% CI 19.7%-41.1%) for the initial Khorana score.<sup>9</sup> Furthermore, a meta-analysis of pooled data from 45 studies on outpatients with various types of cancer showed that only 23.4%

1  
2  
3 (95% CI 18.4% - 29.4%) of the cancer patients who developed VTE in the first six  
4 months had been classified as high risk using the Khorana score; no subgroup analysis  
5 was done on lung cancer patients.<sup>10</sup> The Khorana score may even have poorer predictive  
6 performance in ambulatory patients with lung cancer.<sup>11</sup> Several studies reported no  
7 statistically significant difference in the incidence of VTE between the stratified groups  
8 by the Khorana score.<sup>11-14</sup> In another study, the poor discriminating capacity of the initial  
9 Khorana score in ambulatory lung cancer patients was also indicated by an area under the  
10 receiver operating characteristic curve (AUC) of only 0.51 (95% CI 0.39-0.63).<sup>15</sup>  
11  
12  
13  
14  
15  
16  
17

18 Since its introduction, the Khorana score has been modified several times by the addition  
19 and/or replacement of predictors. In the Vienna Modification or CATS score, D-dimer  
20 and soluble P-selectin were added to the original list of predictors for the Khorana  
21 score.<sup>16</sup> Similarly, in the PROTECHT score, treatment-related factors, such as  
22 gemcitabine and platinum-based chemotherapy, have been added to the original score.<sup>17</sup>  
23 In another score (CONKO), which was developed in advanced pancreatic cancer patients,  
24 the World Health Organization (WHO) Performance Status was added to the risk  
25 assessment model while BMI was removed.<sup>18</sup>  
26  
27  
28  
29  
30  
31

32 In terms of the complexity of the risk assessment tools, they range from a very simple  
33 model (the MD-CAT model) with only two factors, namely distant metastases and  
34 platinum therapy,<sup>19</sup> to more complicated models with both cancer-related and  
35 predisposing factors as well as platelet count (the COMPASS-CAT score),<sup>20</sup> to a model  
36 which uses continuous D-dimer concentrations rather than a cut-off value (the CATS-  
37 MICA model).<sup>21</sup> Despite being potentially useful, having this many models may add to  
38 the practical complexity of VTE risk assessment in terms of choosing the best model for  
39 individual types of cancer or patients.  
40  
41  
42  
43  
44  
45

46 For assessing the risk of VTE in ambulatory patients with lung cancer, the PROTECHT  
47 score and the CONKO score both had a poor discriminating capacity, with an AUC of  
48 0.53 (95% CI 0.40-0.66) and 0.59 (95% CI 0.45-0.73), respectively.<sup>15</sup> The COMPASS-  
49 CAT score had an improved sensitivity of 83% but a worsened specificity of 51% (95%  
50 CIs were not reported).<sup>22</sup>  
51  
52  
53  
54  
55  
56  
57  
58  
59  
60

1  
2  
3 In our recent brief review, we identified some risk prediction models for VTE in  
4 ambulatory patients with lung cancer.<sup>23</sup> However, it is still uncertain how many VTE  
5 prediction models in total are available and which prediction model best suits the clinical  
6 purpose in terms of a reliable predictive performance in ambulatory patients with lung  
7 cancer.  
8  
9

10  
11  
12 This study will be performed with the following two key questions:

- 13  
14 ➤ What VTE prediction models are available to be used in adult ambulatory patients  
15 with lung cancer?
- 16  
17 ➤ Which VTE risk assessment model has the best predictive performance in adult  
18 ambulatory patients with lung cancer?  
19  
20  
21  
22

## 23 **OBJECTIVES**

24  
25 The objectives of this systematic review are as follows:

- 26  
27 1. Summarise the features of the existing VTE risk prediction models in ambulatory  
28 patients with lung cancer;
- 29  
30 2. Conduct meta-analyses to estimate the overall performance of each risk model for  
31 predicting VTE in ambulatory patients with lung cancer within 12 months from the  
32 diagnosis of cancer; and
- 33  
34 3. Compare the performance of the existing models for predicting VTE in ambulatory  
35 patients with lung cancer by individual study findings or meta-analyses results.  
36  
37  
38  
39  
40

## 41 **METHODS AND ANALYSIS**

42  
43 This report adheres to the preferred reporting items for systematic review and meta-  
44 analysis protocols (PRISMA-P) guidance (Table 1).<sup>24</sup>  
45  
46

### 47 **Inclusion criteria**

#### 48 *Patients*

49  
50  
51  
52 The systematic review will include published studies which were undertaken on adult  
53 ambulatory patients with primary lung cancer diagnosed by histopathology. For a study  
54  
55  
56  
57



1  
2  
3 to be included, the diagnosis of VTE should be confirmed by appropriate reference  
4 methods (e.g. ultrasonography or computerised tomography). A summary of inclusion  
5 and exclusion criteria can be found in Box 1.  
6  
7

### 8 9 10 *Type of studies to be included*

11  
12 This systematic review will include all study designs in which risk prediction models for  
13 VTE were developed and/or validated.  
14

### 15 16 17 *Time period*

18  
19 The follow-up period will be 12 months from the diagnosis of cancer, or shorter if VTE  
20 or death from any cause occurs.  
21

### 22 23 24 *Predicted outcomes*

25  
26 The primary outcome (to be predicted) is VTE, confirmed by ultrasonography or  
27 computerised tomography or venogram or angiography or magnetic resonance, or  
28 consensus by an expert clinical panel.  
29

30  
31 Secondary outcomes (to be predicted) are death from any cause and other thrombotic  
32 events.  
33

### 34 35 36 **Patient and public involvement**

37  
38 It is not applicable, because this is a protocol for a systematic review.  
39

### 40 41 42 **Search strategies**

43  
44 Full-text peer-reviewed journal articles will be searched on Medline, Cochrane, CINAH,  
45 Embase and Web of Science for articles published in English from inception of the  
46 database to the current time.  
47

48  
49 The search syntax will be:

- 50  
51 1. “lung cancer” OR “lung tumo?r” OR “lung neoplasm\*” OR “lung  
52 adenocarcinoma\*” OR “lung carcinoma\*” OR “lung squamous cell carcinoma\*”  
53  
54  
55  
56  
57

- 1  
2  
3 OR SCLC OR “large cell neuroendocrine carcinoma\*” OR LCNEC OR  
4 “carcinoid tumo?r” OR NSCLC  
5  
6  
7 2. “venous thromboembolism” OR thrombosis, thromboemboli\*, VTE OR “deep  
8 vein thrombosis” OR DVT OR “pulmonary embolism” OR PE  
9  
10 3. “risk model\*” OR “risk assessment” OR “risk stratification” OR “risk prediction”  
11 OR “risk scor\*” OR “predict\* model\*” OR “predictive scor\*” OR “prediction  
12 tool\*” OR “scoring system\*” OR “score system\*” OR “prognos\* predict\*” OR  
13 “multivaria\* predict\*”  
14  
15  
16  
17 4. #1 AND #2 AND #3  
18  
19

### 20 **Study selection process**

21  
22 Two of the authors (A-RY and RM) will independently screen the preliminary search  
23 results for titles and abstracts using the inclusion and exclusion criteria (Box 1) with  
24 discrepancies being referred to the third reviewer (MN) to resolve. Two reviewers (A-RY  
25 and RM) will then screen the full text of relevant articles and exclude irrelevant articles,  
26 with disagreements being resolved by a third reviewer (IS). The references of the  
27 included studies and additional sources (e.g. systematic reviews) will be checked for any  
28 missed studies. The COVIDENCE platform will be used to record included/excluded  
29 studies.<sup>25</sup>  
30  
31  
32  
33  
34  
35

### 36 **Data extraction**

37  
38 According to the CHARMS Checklist,<sup>26</sup> the following data will be extracted where  
39 available: first author, year of publication, study design, source of data, participant  
40 eligibility, recruitment, description and treatment, sample size, the number and/or  
41 incidence of outcomes defined above, missing data, follow-up period, the type of VTE  
42 risk model(s) and included predictors, the modelling method and evaluation, risk ratios or  
43 odds ratios for the predictors (both overall and stratified), the model performance such as  
44 calibration (e.g. calibration plot and Hosmer-Lemeshow test), discriminating capacity  
45 (e.g. AUC and Concordance index (C-index)) and classification measures (i.e. sensitivity,  
46 specificity, positive predictive value and negative predictive value), as well as the study  
47 limitations.  
48  
49  
50  
51  
52  
53  
54  
55  
56  
57

1  
2  
3 Data will be extracted from the included articles by author (A-RY) using an Excel table  
4 and reviewed by a second author (RM), and then double-checked by a third reviewer  
5 (DY). If there are any required data that are not reported or unclearly presented in the  
6 paper, enquiries will be made from the corresponding authors via email. The COVIDENCE  
7 platform will be used to record extracted data from the included studies for assessment of  
8 study quality and evidence synthesis.<sup>25</sup>  
9  
10  
11  
12

### 13 14 **Additional data**

15  
16  
17 The risk of VTE is highest in the first three months following diagnosis and remains  
18 relatively high during the first year (adjusted OR 53.5, 95% CI 8.6-334.3 for 0-3 months;  
19 adjusted OR 14.3, 95% CI 5.8-35.3 for 3-12 months and adjusted OR 3.6, 95% CI 2.0-6.5  
20 between 1 and 3 years).<sup>27</sup> As a result, combining the numbers of VTE events that  
21 occurred within different follow-up periods will be meaningless. To facilitate a valid data  
22 synthesis, if the data for the 12-month follow-up period are not reported, the relevant  
23 information will be sought from the authors.  
24  
25  
26  
27  
28  
29

### 30 **Quality assessment**

31  
32 The included studies will be assessed by the Prediction model Risk Of Bias ASessment  
33 Tool (PROBAST). PROBAST includes the following domains: participants, predictors,  
34 outcome and analysis, with two, three, six and nine signalling questions, respectively, to  
35 make a risk of bias (RoB) evaluation.<sup>28</sup>  
36  
37  
38  
39

40 The applicability of the original risk modelling studies to our review questions will also  
41 be assessed through PROBAST in the following three domains: participants, predictors  
42 and outcome.<sup>28</sup> Two reviewers (A-RY and RM) will independently assess the risk of bias  
43 and applicability for individual included studies, and any discrepancies will be resolved  
44 by a third reviewer (GMP).  
45  
46  
47  
48

### 49 **Data synthesis**

50  
51 All authors will participate in the development of the manuscript. Results will be reported  
52 based on the Preferred Reporting Items for Systematic Reviews and Meta-Analyses  
53 (PRISMA) guidance.<sup>29</sup> A narrative synthesis will be reported with the characteristics of a  
54  
55  
56  
57

1  
2  
3 range of VTE risk models from the included studies. Under each risk model, the data  
4 from the same follow-up period will be synthesised for meta-analysis with Review  
5 Manager (RevMan) 5.4 software (Copenhagen: The Nordic Cochrane Centre. The  
6 Cochrane Collaboration).  
7  
8  
9

10 In the meta-analysis, studies will be weighted based on the assumptions about the  
11 distribution of the effect size and the definition of variance under the specific  
12 assumptions.<sup>30</sup> Odds ratios (OR) with 95% confidence intervals (95% CI) of occurrence  
13 of VTE will be calculated to determine the pooled discriminating capacity of individual  
14 risk stratification models. Heterogeneity will be explored by using the chi-square test,  
15 where a *P*-value of <0.10 indicates significant heterogeneity. Inconsistency across studies  
16 will be then quantified with the *I*<sup>2</sup> statistic test, where an *I*<sup>2</sup> value between 50% and 75%  
17 indicates moderate heterogeneity, while a value of >75% indicates high heterogeneity. A  
18 fixed effect model will be used if there are low levels of clinical or statistical  
19 heterogeneity, and a random effects model will be used when the heterogeneity is beyond  
20 50%.  
21  
22  
23  
24  
25  
26  
27  
28  
29

30 The analysis of publication bias will be assessed by using funnel plots with Egger's  
31 method if there are ten or more studies included in the systematic review.<sup>31</sup> Sensitivity  
32 analysis will be performed to explore the source of heterogeneity, such as risk of bias.  
33  
34  
35  
36

## 37 CONCLUSION

38  
39 Although some VTE risk prediction models have been developed and validated in  
40 ambulatory patients with cancer,<sup>6 16-21</sup> their performance is still largely unclear in patients  
41 with lung cancer.<sup>10 11 15 22 32</sup> Only with a reliable and robust VTE risk stratification can  
42 thromboprophylaxis be effectively administrated.<sup>5</sup> The results of this systematic review  
43 will help identify VTE risk prediction models with the best performance in ambulatory  
44 lung cancer patients.  
45  
46  
47  
48  
49

50  
51 **Author Statement** A-RY and RM initiated and designed the study. IS, MN, GMP and  
52 DY contributed to the study design. A-RY drafted the manuscript. All the authors took  
53 part in the revision and development of the manuscript and approved the final version.  
54  
55  
56  
57

1  
2  
3 **Conflicts of interests** None  
4

5 **Funding** None  
6  
7

8  
9 **REFERENCES**

- 10  
11 1. World Health Organization. Cancer fact sheets. 2020 (available at  
12 <http://gco.iarc.fr/today/fact-sheets-cancers>).
- 13 2. Timp J, Braekkan SK, Versteeg HH, Cannegieter SC. Epidemiology of cancer-associated venous  
14 thrombosis. *Blood* 2013;122:1712-23. doi: 10.1182/blood-2013-04-460121
- 15 3. Connolly GC, Dalal M, Lin J, et al. Incidence and predictors of venous thromboembolism (VTE)  
16 among ambulatory patients with lung cancer. *Lung Cancer* 2012;78:253-58. doi:  
17 10.1016/j.lungcan.2012.09.007
- 18 4. Chew HK, Davies AM, Wun T, et al. The incidence of venous thromboembolism among  
19 patients with primary lung cancer. *J Thromb Haemost* 2008;6:601-08. doi:  
20 10.1111/j.1538-7836.2008.02908.x
- 21 5. Key NS, Khorana AA, Kuderer NM, et al. Venous Thromboembolism Prophylaxis and  
22 Treatment in Patients With Cancer: ASCO Clinical Practice Guideline Update. *J Clin Oncol*  
23 2020;38:496-520. doi: 10.1200/JCO.19.01461
- 24 6. Khorana A, Kuderer NM, Culakova E, Lyman GH, Francis CW. Development and validation of a  
25 predictive model for chemotherapy-associated thrombosis. *Blood* 2008;111:4902-07.  
26 doi: 10.1182/blood-2007-10-116327
- 27 7. Khorana AA, Soff GA, Kakkar AK, et al. Rivaroxaban for Thromboprophylaxis in High-Risk  
28 Ambulatory Patients with Cancer. *N Engl J Med* 2019;380:720-28. doi:  
29 10.1056/NEJMoa1814630
- 30 8. Carrier M, Abou-Nassar K, Mallick R, et al. Apixaban to Prevent Venous Thromboembolism in  
31 Patients with Cancer. *N Eng J Med* 2018;380:711-19. doi: 10.1056/NEJMoa1814468
- 32 9. Haltout J, Awada A, Paesmans M, Moreau M, Klastersky J, Machiels G, Ignatiadis M, Kotecki N.  
33 Predictive factors for cancer-associated thrombosis in a large retrospective single-center  
34 study. *Support Care Cancer* 2019;27:1163-70. doi: 10.1007/s00520-018-4602-6
- 35 10. Mulder FI, Candeloro M, Kamphuisen PW, et al. The khorana score for prediction of venous  
36 thromboembolism in cancer patients: A systematic review and meta-analysis.  
37 *Haematologica* 2019;104:1277-87. doi: 10.3324/haematol.2018.209114
- 38 11. van Es N, Ventresca M, Di Nisio M, et al. The Khorana score for prediction of venous  
39 thromboembolism in cancer patients: An individual patient data meta-analysis. *J*  
40 *Thromb Haemost* 2020;18:1940-51. doi: 10.1111/jth.14824
- 41 12. Vathiotis I, Dimakakos EP, Boura P, et al. Khorana Score: New Predictor of Early Mortality in  
42 Patients With Lung Adenocarcinoma. *Clin appl thromb-hem* 2018;24:1347-51. doi:  
43 10.1177/1076029618777153
- 44 13. Kuderer NM, Poniewierski MS, Culakova E, et al. Predictors of Venous Thromboembolism  
45 and Early Mortality in Lung Cancer: Results from a Global Prospective Study  
46 (CANTARISK). *Oncologist* 2018;23:247-55. doi: 10.1634/theoncologist.2017-0205
- 47 14. Mansfield AS, Tafur AJ, Wang CE, et al. Predictors of active cancer thromboembolic  
48 outcomes: validation of the Khorana score among patients with lung cancer. *J Thromb*  
49 *Haemost* 2016;14:1773-78. doi: 10.1111/jth.13378  
50  
51  
52  
53  
54  
55  
56  
57  
58  
59  
60

15. Alexander M, Ball D, Solomon B, et al. Dynamic Thromboembolic Risk Modelling to Target Appropriate Preventative Strategies for Patients with Non-Small Cell Lung Cancer. *Cancers* 2019;11(1):50. doi: 10.3390/cancers11010050
16. Ay C, Dunkler D, Marosi C, et al. Prediction of venous thromboembolism in cancer patients. *Blood* 2010;116:5377-82. doi: 10.1182/blood-2010-02-270116
17. Verso M, Agnelli G, Barni S, Gasparini G, Labianca R. A modified Khorana risk assessment score for venous thromboembolism in cancer patients receiving chemotherapy: the Protecht score. *Intern Emerg Med* 2012;7:291-92. doi: 10.1007/s11739-012-0784-y
18. Pelzer U, Sinn M, Stieler J, Riess, H. Primary pharmacological prevention of thromboembolic events in ambulatory patients with advanced pancreatic cancer treated with chemotherapy. *Dtsch med Wochenschr* 2013;138:2084-88. doi: 10.1055/s-0033-1349608
19. Rojas-Hernandez C, Tang VK, Sanchez-Petitto G, Qiao W, Richardson M, Escalante C. . Development of a clinical prediction tool for cancer-associated venous thromboembolism (CAT): the MD Anderson Cancer Center CAT model. *Support Care Cancer* 2020;28:3755-61. doi: 10.1007/s00520-019-05150-z
20. Gerotziafas GT, Taher A, Abdel-Razeq H, et al. A Predictive Score for Thrombosis Associated with Breast, Colorectal, Lung, or Ovarian Cancer: The Prospective COMPASS-Cancer-Associated Thrombosis Study. *Oncologist* 2017;22:1222-31. doi: 10.1634/theoncologist.2016-0414
21. Pabinger I, van Es N, Heinze G, Posch F, Riedl J, Reitter EM, Di Nisio M, Cesarman-Maus G, Kraaijpoel N, Zielinski CC, Büller HR & Ay C. . A clinical prediction model for cancer-associated venous thromboembolism: a development and validation study in two independent prospective cohorts. *Lancet Haematol* 2018;5:e289-e98. doi: 10.1016/S2352-3026(18)30063-2
22. Syrigos K, Grapsa D, Sangare R, et al. Prospective Assessment of Clinical Risk Factors and Biomarkers of Hypercoagulability for the Identification of Patients with Lung Adenocarcinoma at Risk for Cancer-Associated Thrombosis: The Observational ROADMAP-CAT Study. *Oncologist* 2018;23:1372-81. doi: 10.1634/theoncologist.2017-0530
23. Yan A-R, Samarawickrema I, Naunton M, et al. Risk Factors and Prediction Models for Venous Thromboembolism in Ambulatory Patients with Lung Cancer. *Healthcare* 2021;9:778. doi: 10.3390/healthcare9060778
24. Shamseer L, Moher D, Clarke M, et al. Preferred reporting items for systematic review and meta-analysis protocols (PRISMA-P) 2015: elaboration and explanation. *BMJ* 2015;350:g7647. doi: 10.1136/bmj.g7647
25. Covidence. (available at <https://www.covidence.org/>).
26. Moons K, de Groot JA, Bouwmeester W, Vergouwe Y, Mallett S, Altman DG, Reitsma JB, Collins GS. Critical appraisal and data extraction for systematic reviews of prediction modelling studies: the CHARMS checklist. *PLoS Med* 2014;11:e1001744. doi: 10.1371/journal.pmed.1001744
27. Blom JW, Doggen CJ, Osanto S, et al. Malignancies, prothrombotic mutations, and the risk of venous thrombosis. *JAMA* 2005;293:715-22. doi: 10.1001/jama.293.6.715
28. Wolff RF, Moons KGM, Riley RD, et al. PROBAST: A Tool to Assess the Risk of Bias and Applicability of Prediction Model Studies. *Ann Intern Med* 2019;170:51-58. doi: 10.7326/M18-1376

- 1  
2  
3 29. Page MJ MJ, Bossuyt PM, Boutron I, Hoffmann TC, Mulrow CD, et al. . The PRISMA 2020  
4 statement: an updated guideline for reporting systematic reviews. *BMJ* 2021;372:n71.  
5 doi: 10.1136/bmj.n71  
6  
7 30. Bornstein M, Hedges LV, Higgins JPT & Rothstein HR. Introduction to Meta-Analysis.  
8 Chichester, West Sussex, United Kingdom: Wiley 2009.  
9  
10 31. Egger M, Davey Smith G, Schneider M, Minder C. Bias in meta-analysis detected by a simple,  
11 graphical test. *BMJ (Clinical research ed)* 1997;315:629-34.  
12  
13 32. Ferroni P, Martini F, Portarena I, et al. Novel high-sensitive D-dimer determination predicts  
14 chemotherapy-associated venous thromboembolism in intermediate risk lung cancer  
15 patients. *Clin lung cancer* 2012;13:482-87. doi: 10.1016/j.clcc.2012.03.005  
16  
17  
18  
19  
20  
21  
22  
23  
24  
25  
26  
27  
28  
29  
30  
31  
32  
33  
34  
35  
36  
37  
38  
39  
40  
41  
42  
43  
44  
45  
46  
47  
48  
49  
50  
51  
52  
53  
54  
55  
56  
57  
58  
59  
60

**Table 1** PRISMA-P (preferred reporting items for systematic review and meta-analysis protocols) 2015 checklist

| Section and topic                 | Item No. | Checklist item                                                                                                                                                                                  | Reported on page No. |
|-----------------------------------|----------|-------------------------------------------------------------------------------------------------------------------------------------------------------------------------------------------------|----------------------|
| <b>Administrative information</b> |          |                                                                                                                                                                                                 |                      |
| Title:                            |          |                                                                                                                                                                                                 |                      |
| Identification                    | 1a       | Identify the report as a protocol of a systematic review                                                                                                                                        | 1                    |
| Update                            | 1b       | If the protocol is for an update of a previous systematic review, identify as such                                                                                                              | NA                   |
| Registration                      | 2        | If registered, provide the name of the registry (such as PROSPERO) and registration number                                                                                                      | 1                    |
| Authors:                          |          |                                                                                                                                                                                                 |                      |
| Contact                           | 3a       | Provide name, institutional affiliation, e-mail address of all protocol authors; provide physical mailing address of corresponding author                                                       | 1                    |
| Contributions                     | 3b       | Describe contributions of protocol authors and identify the guarantor of the review                                                                                                             | 9                    |
| Amendments                        | 4        | If the protocol represents an amendment of a previously completed or published protocol, identify as such and list changes; otherwise, state plan for documenting important protocol amendments | NA                   |
| Support:                          |          |                                                                                                                                                                                                 |                      |
| Sources                           | 5a       | Indicate sources of financial or other support for the review                                                                                                                                   | 9                    |
| Sponsor                           | 5b       | Provide name for the review funder and/or sponsor                                                                                                                                               | NA                   |
| Role of sponsor or funder         | 5c       | Describe roles of funder(s), sponsor(s), and/or institution(s), if any, in developing the protocol                                                                                              | NA                   |
| <b>Introduction</b>               |          |                                                                                                                                                                                                 |                      |
| Rationale                         | 6        | Describe the rationale for the review in the context of what is already known                                                                                                                   | 3-4                  |



| Section and topic           | Item No. | Checklist item                                                                                                                                                                                                                | Reported on page No. |
|-----------------------------|----------|-------------------------------------------------------------------------------------------------------------------------------------------------------------------------------------------------------------------------------|----------------------|
| Objectives                  | 7        | Provide an explicit statement of the question(s) the review will address with reference to participants, interventions, comparators, and outcomes (PICO)                                                                      | 5                    |
| <b>Methods</b>              |          |                                                                                                                                                                                                                               |                      |
| Eligibility criteria        | 8        | Specify the study characteristics (such as PICO, study design, setting, time frame) and report characteristics (such as years considered, language, publication status) to be used as criteria for eligibility for the review | 6                    |
| Information sources         | 9        | Describe all intended information sources (such as electronic databases, contact with study authors, trial registers or other grey literature sources) with planned dates of coverage                                         | 6                    |
| Search strategy             | 10       | Present draft of search strategy to be used for at least one electronic database, including planned limits, such that it could be repeated                                                                                    | 6-7                  |
| Study records:              |          |                                                                                                                                                                                                                               |                      |
| Data management             | 11a      | Describe the mechanism(s) that will be used to manage records and data throughout the review                                                                                                                                  | 7                    |
| Selection process           | 11b      | State the process that will be used for selecting studies (such as two independent reviewers) through each phase of the review (that is, screening, eligibility and inclusion in meta-analysis)                               | 7,13                 |
| Data collection process     | 11c      | Describe planned method of extracting data from reports (such as piloting forms, done independently, in duplicate), any processes for obtaining and confirming data from investigators                                        | 7-8                  |
| Data items                  | 12       | List and define all variables for which data will be sought (such as PICO items, funding sources), any pre-planned data assumptions and simplifications                                                                       | 8                    |
| Outcomes and prioritization | 13       | List and define all outcomes for which data will be sought, including prioritization of main and additional outcomes, with rationale                                                                                          | 6                    |

| Section and topic                  | Item No. | Checklist item                                                                                                                                                                                                                                   | Reported on page No. |
|------------------------------------|----------|--------------------------------------------------------------------------------------------------------------------------------------------------------------------------------------------------------------------------------------------------|----------------------|
| Risk of bias in individual studies | 14       | Describe anticipated methods for assessing risk of bias of individual studies, including whether this will be done at the outcome or study level, or both; state how this information will be used in data synthesis                             | 8                    |
| Data synthesis                     | 15a      | Describe criteria under which study data will be quantitatively synthesised                                                                                                                                                                      | 9                    |
|                                    | 15b      | If data are appropriate for quantitative synthesis, describe planned summary measures, methods of handling data and methods of combining data from studies, including any planned exploration of consistency (such as $I^2$ , Kendall's $\tau$ ) | 9                    |
|                                    | 15c      | Describe any proposed additional analyses (such as sensitivity or subgroup analyses, meta-regression)                                                                                                                                            | 9                    |
|                                    | 15d      | If quantitative synthesis is not appropriate, describe the type of summary planned                                                                                                                                                               | 9                    |
| Meta-bias(es)                      | 16       | Specify any planned assessment of meta-bias(es) (such as publication bias across studies, selective reporting within studies)                                                                                                                    | 9                    |
| Confidence in cumulative evidence  | 17       | Describe how the strength of the body of evidence will be assessed (such as GRADE)                                                                                                                                                               | NA                   |

**Box 1** Inclusion and exclusion criteria

## Inclusion criteria:

- (1) Full-text peer-reviewed journal articles of experimental or observational study types which developed or validated a prognostic model for VTE in adult ambulatory patients with primary lung cancer; and
- (2) Primary lung cancer was diagnosed by histopathology; and
- (3) VTE was confirmed by ultrasonography or computerised tomography or venogram or angiography or magnetic resonance, or consensus by an expert panel; and
- (4) VTE was identified within one year of the diagnosis of primary lung cancer; and
- (5) Published from the inception of databases to 30/09/2021; and
- (6) Published in English.

## Exclusion criteria:

- (1) Studies of VTE with genetic profiling only; or
- (2) Studies of VTE in patients on chronic (>2 months) antithrombotic or thrombolytic treatment at recruitment or during the follow-up period; or
- (3) Studies of recurrent cancer related VTE; or
- (4) Duplication of the same study; or
- (5) full text unavailable.

# BMJ Open

## Models for predicting venous thromboembolism in ambulatory patients with lung cancer: a systematic review protocol

|                                 |                                                                                                                                                                                                                                                                                                                                                                                                                                                                                                                                                                                                                                                                                                                                                                 |
|---------------------------------|-----------------------------------------------------------------------------------------------------------------------------------------------------------------------------------------------------------------------------------------------------------------------------------------------------------------------------------------------------------------------------------------------------------------------------------------------------------------------------------------------------------------------------------------------------------------------------------------------------------------------------------------------------------------------------------------------------------------------------------------------------------------|
| Journal:                        | <i>BMJ Open</i>                                                                                                                                                                                                                                                                                                                                                                                                                                                                                                                                                                                                                                                                                                                                                 |
| Manuscript ID                   | bmjopen-2021-055322.R1                                                                                                                                                                                                                                                                                                                                                                                                                                                                                                                                                                                                                                                                                                                                          |
| Article Type:                   | Protocol                                                                                                                                                                                                                                                                                                                                                                                                                                                                                                                                                                                                                                                                                                                                                        |
| Date Submitted by the Author:   | 08-Nov-2021                                                                                                                                                                                                                                                                                                                                                                                                                                                                                                                                                                                                                                                                                                                                                     |
| Complete List of Authors:       | Yan, Ann-Rong; University of Canberra Faculty of Health, School of Health Sciences<br>Samarawickrema, Indira; University of Canberra Faculty of Health, School of Nursing, Midwifery and Public Health<br>Naunton, Mark; University of Canberra Faculty of Health, School of Health Sciences<br>Peterson, Gregory; University of Canberra Faculty of Health, School of Health Sciences; University of Tasmania College of Health and Medicine<br>Yip, Desmond; Australian National University, Medical School; Canberra Hospital, Department of Medical Oncology<br>Mortazavi, Reza; University of Canberra Faculty of Health, School of Health Sciences; University of Canberra Faculty of Health, Prehab Activity Cancer Exercise Survivorship research group |
| <b>Primary Subject Heading</b>: | Oncology                                                                                                                                                                                                                                                                                                                                                                                                                                                                                                                                                                                                                                                                                                                                                        |
| Secondary Subject Heading:      | Haematology (incl blood transfusion)                                                                                                                                                                                                                                                                                                                                                                                                                                                                                                                                                                                                                                                                                                                            |
| Keywords:                       | Respiratory tract tumours < THORACIC MEDICINE, Thromboembolism < CARDIOLOGY, Anticoagulation < HAEMATOLOGY                                                                                                                                                                                                                                                                                                                                                                                                                                                                                                                                                                                                                                                      |
|                                 |                                                                                                                                                                                                                                                                                                                                                                                                                                                                                                                                                                                                                                                                                                                                                                 |

SCHOLARONE™  
Manuscripts



I, the Submitting Author has the right to grant and does grant on behalf of all authors of the Work (as defined in the below author licence), an exclusive licence and/or a non-exclusive licence for contributions from authors who are: i) UK Crown employees; ii) where BMJ has agreed a CC-BY licence shall apply, and/or iii) in accordance with the terms applicable for US Federal Government officers or employees acting as part of their official duties; on a worldwide, perpetual, irrevocable, royalty-free basis to BMJ Publishing Group Ltd ("BMJ") its licensees and where the relevant Journal is co-owned by BMJ to the co-owners of the Journal, to publish the Work in this journal and any other BMJ products and to exploit all rights, as set out in our [licence](#).

The Submitting Author accepts and understands that any supply made under these terms is made by BMJ to the Submitting Author unless you are acting as an employee on behalf of your employer or a postgraduate student of an affiliated institution which is paying any applicable article publishing charge ("APC") for Open Access articles. Where the Submitting Author wishes to make the Work available on an Open Access basis (and intends to pay the relevant APC), the terms of reuse of such Open Access shall be governed by a Creative Commons licence – details of these licences and which [Creative Commons](#) licence will apply to this Work are set out in our licence referred to above.

Other than as permitted in any relevant BMJ Author's Self Archiving Policies, I confirm this Work has not been accepted for publication elsewhere, is not being considered for publication elsewhere and does not duplicate material already published. I confirm all authors consent to publication of this Work and authorise the granting of this licence.

# Models for predicting venous thromboembolism in ambulatory patients with lung cancer: a systematic review protocol

Ann-Rong Yan <sup>1</sup>, Indira Samarawickrema <sup>2</sup>, Mark Naunton <sup>1</sup>, Gregory M. Peterson <sup>1,3</sup>, Desmond Yip <sup>4,5</sup>, and Reza Mortazavi <sup>1,6\*</sup>

<sup>1</sup> School of Health Sciences, Faculty of Health, University of Canberra, Canberra, ACT, Australia; [ann-rong.yan@canberra.edu.au](mailto:ann-rong.yan@canberra.edu.au) (A-RY); [mark.naunton@canberra.edu.au](mailto:mark.naunton@canberra.edu.au) (MN);

[g.peterson@utas.edu.au](mailto:g.peterson@utas.edu.au) (GMP); [reza.mortazavi@canberra.edu.au](mailto:reza.mortazavi@canberra.edu.au) (RM)

<sup>2</sup> School of Nursing, Midwifery and Public Health, Faculty of Health, University of Canberra, Canberra, ACT, Australia; [Indira.Samarawickrema@canberra.edu.au](mailto:Indira.Samarawickrema@canberra.edu.au)

<sup>3</sup> College of Health and Medicine, University of Tasmania, TAS, Australia

<sup>4</sup> ANU Medical School, Australian National University, Canberra, ACT, Australia;

[desmond.yip@anu.edu.au](mailto:desmond.yip@anu.edu.au)

<sup>5</sup> Department of Medical Oncology, The Canberra Hospital, Garran, ACT, Australia

<sup>6</sup> Prehab Activity Cancer Exercise Survivorship research group, Faculty of Health, University of Canberra, Canberra, ACT, Australia

\* Correspondence: [reza.mortazavi@canberra.edu.au](mailto:reza.mortazavi@canberra.edu.au)

## ABSTRACT

**Introduction:** Venous thromboembolism (VTE) is a common complication in patients with cancer and has a determining role in the disease prognosis. The risk is significantly increased with certain types of cancer, such as lung cancer. Partly due to difficulties in managing haemorrhage in outpatient settings, anticoagulant prophylaxis is only recommended for ambulatory patients at high risk of VTE. This requires a precise VTE risk assessment in individual patients. Although VTE risk assessment models have been developed and updated in recent years, there are conflicting reports on the effectiveness of such risk prediction models in patient management. The aim of this systematic review is to gain a better understanding of the available VTE risk assessment tools for ambulatory patients with lung cancer and compare their predictive performance.

**Methods and analysis:** A systematic review will be conducted using MEDLINE, Cochrane Library, CINAHL, Scopus, and Web of Science databases from inception to Sept 30, 2021, to identify all reports published in English describing VTE risk prediction models which have included adult ambulatory patients with primary lung cancer for model development and/or validation. Two independent reviewers will conduct article screening, study selection, data extraction and quality assessment of the primary studies. Any disagreements will be referred to a third researcher to resolve. The included studies will be assessed for risk of bias and applicability. The CheckList for critical Appraisal and data extraction for systematic Reviews of prediction Modelling Studies (CHARMS) will be used for data extraction and appraisal. Data from similar studies will be used for meta-analysis to determine the incidence of VTE and the performance of the risk models.

**Ethics and dissemination:** Ethics approval is not required. We will disseminate the results in a peer-reviewed journal.

**Keywords:** thromboembolism; respiratory tract tumours; anticoagulant

**PROSPERO registration number:** CRD42021245907

### Strengths and limitations of this study

- To the best of our knowledge, this is the first systematic review of VTE risk assessment models for use in ambulatory patients with lung cancer.
- There will likely be heterogeneity among the included studies due to differences in study populations, research methods, anti-cancer treatments, and the follow-up periods.
- The restriction to use articles published in English may introduce some bias.

## INTRODUCTION

Lung cancer is the second most common type of cancer globally, and it has the highest mortality rate among all cancers.<sup>1</sup> Cancer is a risk factor for venous thromboembolism (VTE) and the incidence of VTE varies with the histological type, stage and aggressiveness of the cancer.<sup>2</sup> In lung cancer patients receiving chemotherapy, the incidence of VTE during a median follow-up period of 12 months was reported to be as high as 13.9%.<sup>3</sup> It has been reported that having VTE is a significant predictor of death within two years in patients with primary lung cancer, with hazard ratios of 2.3 (95% CI 2.2-2.4) and 1.5 (95% CI 1.3-1.7) for non-small cell lung cancer (NSCLC) and small cell lung cancer (SCLC), respectively.<sup>4</sup>

The current American Society of Clinical Oncology (ASCO) Clinical Practice Guidelines for Venous Thromboembolism Prophylaxis and Treatment in Patients With Cancer, only recommend thromboprophylaxis in patients whose risk of developing VTE has been assessed as high using a VTE risk prediction model called the Khorana score.<sup>5</sup>

The Khorana Score was developed in 2008 for predicting VTE risk in ambulatory cancer patients receiving chemotherapy.<sup>6</sup> It uses the following five items: cancer site, platelet count, leucocyte count, haemoglobin level, and body mass index (BMI). In using this scoring tool, 2 points are allocated to very high-risk cancers (e.g. stomach and pancreas), 1 point is given for high-risk cancers (e.g. lung, lymphoma, gynaecological, bladder, testicular), 1 point for baseline platelet count  $\geq 350 \times 10^9/L$ , 1 point for baseline leukocyte count  $> 11 \times 10^9/L$ , 1 point for baseline haemoglobin level  $< 100 \text{ g/L}$  or use of erythropoietin, and 1 point for BMI  $\geq 35 \text{ kg/m}^2$ .<sup>6</sup> In the original risk model, a total score of 0 indicates a low risk, a total score of 1 to 2 suggests an intermediate risk, and a score of 3 or more indicates a high-risk situation.<sup>6</sup> Recently, a different cut-off score of 2 was used to stratify high-risk groups in two randomised controlled trials of anticoagulant thromboprophylaxis.<sup>7,8</sup>

An external validation study undertaken by Haltout *et al.* on solid tumours reported a high specificity of 92.8% (95% CI 91.5%-94.0%), but a poor sensitivity of 29.3% (95% CI 19.7%-41.1%) for the initial Khorana score.<sup>9</sup> Furthermore, a meta-analysis of pooled data from 45 studies on outpatients with various types of cancer showed that only 23.4%



1  
2  
3 (95% CI 18.4% - 29.4%) of the cancer patients who developed VTE in the first six  
4 months had been classified as high risk using the Khorana score; no subgroup analysis  
5 was done on lung cancer patients.<sup>10</sup> The Khorana score may even have poorer predictive  
6 performance in ambulatory patients with lung cancer.<sup>11</sup> Several studies reported no  
7 statistically significant difference in the incidence of VTE between the stratified groups  
8 by the Khorana score.<sup>11-14</sup> In another study, the poor discriminating capacity of the initial  
9 Khorana score in ambulatory lung cancer patients was also indicated by an area under the  
10 receiver operating characteristic curve (AUC) of only 0.51 (95% CI 0.39-0.63).<sup>15</sup>  
11  
12

13  
14 Since its introduction, the Khorana score has been modified several times by the addition  
15 and/or replacement of predictors. In the Vienna Modification or CATS score, D-dimer  
16 and soluble P-selectin were added to the original list of predictors for the Khorana  
17 score.<sup>16</sup> Similarly, in the PROTECHT score, treatment-related factors, such as  
18 gemcitabine and platinum-based chemotherapy, have been added to the original score.<sup>17</sup>  
19 In another score (CONKO), which was developed in advanced pancreatic cancer patients,  
20 the World Health Organization (WHO) Performance Status was added to the risk  
21 assessment model while BMI was removed.<sup>18</sup>  
22  
23

24  
25 In terms of the complexity of the risk assessment tools, they range from a very simple  
26 model (the MD-CAT model) with only two factors, namely distant metastases and  
27 platinum therapy,<sup>19</sup> to more complicated models with both cancer-related and  
28 predisposing factors as well as platelet count (the COMPASS-CAT score),<sup>20</sup> to a model  
29 which uses continuous D-dimer concentrations rather than a cut-off value (the CATS-  
30 MICA model).<sup>21</sup> Despite being potentially useful, having this many models may add to  
31 the practical complexity of VTE risk assessment in terms of choosing the best model for  
32 individual types of cancer or patients.  
33  
34

35  
36 For assessing the risk of VTE in ambulatory patients with lung cancer, the PROTECHT  
37 score and the CONKO score both had a poor discriminating capacity, with an AUC of  
38 0.53 (95% CI 0.40-0.66) and 0.59 (95% CI 0.45-0.73), respectively.<sup>15</sup> The COMPASS-  
39 CAT score had an improved sensitivity of 83% but a worsened specificity of 51% (95%  
40 CIs were not reported).<sup>22</sup>  
41  
42  
43  
44  
45  
46  
47  
48  
49  
50  
51  
52  
53  
54  
55  
56  
57  
58  
59  
60

1  
2  
3 In our recent brief review, we identified some risk prediction models for VTE in  
4 ambulatory patients with lung cancer;<sup>23</sup> however, their performance is still largely  
5 unclear.<sup>10 11 15 22 24</sup> It is still uncertain how many VTE prediction models in total are  
6 available and which prediction model best suits the clinical purpose in terms of a reliable  
7 predictive performance in ambulatory patients with lung cancer.  
8  
9

10  
11  
12 This study will be performed with the following two key questions:

- 13  
14
- 15 ➤ What VTE prediction models are available to be used in adult ambulatory patients  
16 with lung cancer?
  - 17 ➤ Which VTE risk assessment model has the best predictive performance in adult  
18 ambulatory patients with lung cancer?  
19  
20  
21  
22

## 23 **OBJECTIVES**

24  
25 The objectives of this systematic review are as follows:

- 26  
27
- 28 1. Summarise the features of the existing VTE risk prediction models in ambulatory  
29 patients with lung cancer;
  - 30 2. Conduct meta-analyses to estimate the overall performance of each risk model for  
31 predicting VTE in ambulatory patients with lung cancer within 12 months from the  
32 diagnosis of cancer; and  
33 3. Compare the performance of the existing models for predicting VTE in ambulatory  
34 patients with lung cancer by individual study findings or meta-analyses results.  
35  
36  
37  
38  
39  
40

## 41 **METHODS AND ANALYSIS**

### 42 **Inclusion criteria**

#### 43 *Patients*

44  
45  
46  
47  
48 The systematic review will include published studies which were undertaken on adult  
49 ambulatory patients with primary lung cancer diagnosed by histopathology. For a study  
50 to be included, the diagnosis of VTE should be confirmed by appropriate reference  
51 methods (e.g. ultrasonography or computerised tomography). A summary of inclusion  
52 and exclusion criteria can be found in Box 1.  
53  
54  
55  
56  
57

### *Type of studies to be included*

This systematic review will include all study designs in which risk prediction models for VTE were developed and/or validated.

### *Time period*

The follow-up period will be 12 months from the diagnosis of cancer, or shorter if VTE or death from any cause occurs.

### *Predicted outcomes*

The primary outcome (to be predicted) is VTE, confirmed by ultrasonography or computerised tomography or venogram or angiography or magnetic resonance, or consensus by an expert clinical panel.

Secondary outcomes (to be predicted) are death from any cause and other thrombotic events.

### **Search strategies**

Full-text peer-reviewed journal articles will be searched on MEDLINE, Cochrane Library, CINAHL, Scopus and Web of Science for articles published in English from inception of the database to Sept 30, 2021. The search strategy is shown in *Supplementary Table S1*. The strategy was developed in consultation with a medical librarian.

### **Study selection process**

Two of the authors (A-RY and RM) will independently screen the preliminary search results for titles and abstracts using the inclusion and exclusion criteria (Box 1) with discrepancies being referred to the third reviewer (MN) to resolve. Two reviewers (A-RY and RM) will then screen the full text of relevant articles and exclude irrelevant articles, with disagreements being resolved by a third reviewer (IS). The references of the included studies and additional sources (e.g. systematic reviews) will be checked for any

1  
2  
3 missed studies. The COVIDENCE platform will be used to record included/excluded  
4 studies.<sup>25</sup>  
5  
6

### 7 8 **Data extraction**

9  
10 According to the CHARMS Checklist,<sup>26</sup> the following data will be extracted where  
11 available: first author, year of publication, study design, source of data, participant  
12 eligibility, recruitment, description and treatment, sample size, the number and/or  
13 incidence of outcomes defined above, missing data, follow-up period, the type of VTE  
14 risk model(s) and included predictors, the modelling method and evaluation, risk ratios or  
15 odds ratios for the predictors (both overall and stratified), the model performance such as  
16 calibration (e.g. calibration plot and Hosmer-Lemeshow test), discriminating capacity  
17 (e.g. AUC and Concordance index (C-index)) and classification measures (i.e. sensitivity,  
18 specificity, positive predictive value and negative predictive value), as well as the study  
19 limitations.  
20  
21

22  
23  
24  
25  
26  
27  
28 Data will be extracted from the included articles by author (A-RY) using an Excel table  
29 and reviewed by a second author (RM), and then double-checked by a third reviewer  
30 (DY). If there are any required data that are not reported or unclearly presented in the  
31 paper, enquiries will be made from the corresponding authors via email. The COVIDENCE  
32 platform will be used to record extracted data from the included studies for assessment of  
33 study quality and evidence synthesis.<sup>25</sup>  
34  
35  
36  
37  
38

### 39 **Additional data**

40  
41 The risk of VTE is highest in the first three months following diagnosis and remains  
42 relatively high during the first year (adjusted OR 53.5, 95% CI 8.6-334.3 for 0-3 months;  
43 adjusted OR 14.3, 95% CI 5.8-35.3 for 3-12 months and adjusted OR 3.6, 95% CI 2.0-6.5  
44 between 1 and 3 years).<sup>27</sup> As a result, combining the numbers of VTE events that  
45 occurred within different follow-up periods will be meaningless. To facilitate a valid data  
46 synthesis, if the data for the 12-month follow-up period are not reported, the relevant  
47 information will be sought from the authors.  
48  
49  
50  
51  
52  
53

### 54 **Quality assessment**

1  
2  
3 The included studies will be assessed by the Prediction model Risk Of Bias ASessment  
4 Tool (PROBAST). PROBAST includes the following domains: participants, predictors,  
5 outcome, and analysis, with two, three, six and nine signalling questions, respectively, to  
6 make a risk of bias (RoB) evaluation.<sup>28</sup>  
7  
8  
9

10 The applicability of the original risk modelling studies to our review questions will also  
11 be assessed through PROBAST in the following three domains: participants, predictors,  
12 and outcome.<sup>28</sup> Two reviewers (A-RY and RM) will independently assess the risk of bias  
13 and applicability for individual included studies, and any discrepancies will be resolved  
14 by a third reviewer (GMP).  
15  
16  
17  
18

### 19 20 **Data synthesis**

21 All authors will participate in the development of the manuscript. Results will be reported  
22 based on the Preferred Reporting Items for Systematic Reviews and Meta-Analyses  
23 (PRISMA) guidance.<sup>29</sup> A narrative synthesis will be reported with the characteristics of a  
24 range of VTE risk models from the included studies. Under each risk model, the data  
25 from the same follow-up period will be synthesised for meta-analysis with Review  
26 Manager (RevMan) 5.4 software (Copenhagen: The Nordic Cochrane Centre. The  
27 Cochrane Collaboration).  
28  
29  
30  
31  
32  
33  
34

35 In the meta-analysis, studies will be weighted based on the assumptions about the  
36 distribution of the effect size and the definition of variance under the specific  
37 assumptions.<sup>30</sup> Odds ratios (OR) with 95% confidence intervals (95% CI) of occurrence  
38 of VTE will be calculated to determine the pooled discriminating capacity of individual  
39 risk stratification models. Heterogeneity will be explored by using the chi-square test,  
40 where a *P*-value of <0.10 indicates significant heterogeneity. Inconsistency across studies  
41 will be then quantified with the *I*<sup>2</sup> statistic test, where an *I*<sup>2</sup> value between 50% and 75%  
42 indicates moderate heterogeneity, while a value of >75% indicates high heterogeneity. A  
43 fixed effect model will be used if there are low levels of clinical or statistical  
44 heterogeneity, and a random effects model will be used when the heterogeneity is beyond  
45 50%. A sensitivity analysis will be performed on subgroups based on cancer stages,  
46 metastases, and anti-cancer treatment.  
47  
48  
49  
50  
51  
52  
53  
54  
55  
56  
57

1  
2  
3 The analysis of publication bias will be assessed by using funnel plots with Egger's  
4 method if there are ten or more studies included in the systematic review.<sup>31</sup> Sensitivity  
5 analysis will be performed to explore the source of heterogeneity, such as risk of bias.  
6  
7

### 8 9 **Patient and public involvement**

10 There will be no patient or public involvement in the study.  
11  
12

### 13 **Ethics and dissemination**

14 Ethics approval is not required for this research. We will disseminate the results in a peer-  
15 reviewed journal.  
16  
17

### 18 **Acknowledgements**

19 We would like to acknowledge Mr Murray Turner (Faculty of Health, University of  
20 Canberra) for his professional advice on search strategies for all the databases.  
21  
22

23 **Author Statement** A-RY and RM initiated and designed the study. IS, MN, GMP and  
24 DY contributed to the study design. A-RY drafted the manuscript. All the authors took  
25 part in the revision and development of the manuscript and approved the final version.  
26  
27

28 **Conflicts of interests** None  
29  
30

31 **Funding** None  
32  
33

### 34 **REFERENCES**

- 35  
36  
37  
38  
39  
40 1. World Health Organization. Cancer fact sheets. 2020 (available at  
41 <http://gco.iarc.fr/today/fact-sheets-cancers>).
- 42 2. Timp J, Braekkan SK, Versteeg HH, Cannegieter SC. Epidemiology of cancer-associated venous  
43 thrombosis. *Blood* 2013;122:1712-23. doi: 10.1182/blood-2013-04-460121
- 44 3. Connolly GC, Dalal M, Lin J, et al. Incidence and predictors of venous thromboembolism (VTE)  
45 among ambulatory patients with lung cancer. *Lung Cancer* 2012;78:253-58. doi:  
46 10.1016/j.lungcan.2012.09.007
- 47 4. Chew HK, Davies AM, Wun T, et al. The incidence of venous thromboembolism among  
48 patients with primary lung cancer. *J Thromb Haemost* 2008;6:601-08. doi:  
49 10.1111/j.1538-7836.2008.02908.x
- 50 5. Key NS, Khorana AA, Kuderer NM, et al. Venous Thromboembolism Prophylaxis and  
51 Treatment in Patients With Cancer: ASCO Clinical Practice Guideline Update. *J Clin Oncol*  
52 2020;38:496-520. doi: 10.1200/JCO.19.01461  
53  
54  
55  
56  
57

- 1
- 2
- 3
- 4 6. Khorana A, Kuderer NM, Culakova E, Lyman GH, Francis CW. Development and validation of a
- 5 predictive model for chemotherapy-associated thrombosis. *Blood* 2008;111:4902-07.
- 6 doi: 10.1182/blood-2007-10-116327
- 7
- 8 7. Khorana AA, Soff GA, Kakkar AK, et al. Rivaroxaban for Thromboprophylaxis in High-Risk
- 9 Ambulatory Patients with Cancer. *N Engl J Med* 2019;380:720-28. doi:
- 10 10.1056/NEJMoa1814630
- 11
- 12 8. Carrier M, Abou-Nassar K, Mallick R, et al. Apixaban to Prevent Venous Thromboembolism in
- 13 Patients with Cancer. *N Eng J Med* 2018;380:711-19. doi: 10.1056/NEJMoa1814468
- 14
- 15 9. Haltout J, Awada A, Paesmans M, Moreau M, Klastersky J, Machiels G, Ignatiadis M, Kotecki N.
- 16 Predictive factors for cancer-associated thrombosis in a large retrospective single-center
- 17 study. *Support Care Cancer* 2019;27:1163-70. doi: 10.1007/s00520-018-4602-6
- 18
- 19 10. Mulder FI, Candeloro M, Kamphuisen PW, et al. The khorana score for prediction of venous
- 20 thromboembolism in cancer patients: A systematic review and meta-analysis.
- 21 *Haematologica* 2019;104:1277-87. doi: 10.3324/haematol.2018.209114
- 22
- 23 11. van Es N, Ventresca M, Di Nisio M, et al. The Khorana score for prediction of venous
- 24 thromboembolism in cancer patients: An individual patient data meta-analysis. *J*
- 25 *Thromb Haemost* 2020;18:1940-51. doi: 10.1111/jth.14824
- 26
- 27 12. Vathiotis I, Dimakakos EP, Boura P, et al. Khorana Score: New Predictor of Early Mortality in
- 28 Patients With Lung Adenocarcinoma. *Clin appl thromb-hem* 2018;24:1347-51. doi:
- 29 10.1177/1076029618777153
- 30
- 31 13. Kuderer NM, Poniewierski MS, Culakova E, et al. Predictors of Venous Thromboembolism
- 32 and Early Mortality in Lung Cancer: Results from a Global Prospective Study
- 33 (CANTARISK). *Oncologist* 2018;23:247-55. doi: 10.1634/theoncologist.2017-0205
- 34
- 35 14. Mansfield AS, Tafur AJ, Wang CE, et al. Predictors of active cancer thromboembolic
- 36 outcomes: validation of the Khorana score among patients with lung cancer. *J Thromb*
- 37 *Haemost* 2016;14:1773-78. doi: 10.1111/jth.13378
- 38
- 39 15. Alexander M, Ball D, Solomon B, et al. Dynamic Thromboembolic Risk Modelling to Target
- 40 Appropriate Preventative Strategies for Patients with Non-Small Cell Lung Cancer.
- 41 *Cancers* 2019;11(1):50. doi: 10.3390/cancers11010050
- 42
- 43 16. Ay C, Dunkler D, Marosi C, et al. Prediction of venous thromboembolism in cancer patients.
- 44 *Blood* 2010;116:5377-82. doi: 10.1182/blood-2010-02-270116
- 45
- 46 17. Verso M, Agnelli G, Barni S, Gasparini G, Labianca R. A modified Khorana risk assessment
- 47 score for venous thromboembolism in cancer patients receiving chemotherapy: the
- 48 Protecht score. *Intern Emerg Med* 2012;7:291-92. doi: 10.1007/s11739-012-0784-y
- 49
- 50 18. Pelzer U, Sinn M, Stieler J, Riess, H. Primary pharmacological prevention of thromboembolic
- 51 events in ambulatory patients with advanced pancreatic cancer treated with
- 52 chemotherapy. *Dtsch med Wochenschr* 2013;138:2084-88. doi: 10.1055/s-0033-
- 53 1349608
- 54
- 55 19. Rojas-Hernandez C, Tang VK, Sanchez-Petitto G, Qiao W, Richardson M, Escalante C. .
- 56 Development of a clinical prediction tool for cancer-associated venous
- 57 thromboembolism (CAT): the MD Anderson Cancer Center CAT model. *Support Care*
- 58 *Cancer* 2020;28:3755-61. doi: 10.1007/s00520-019-05150-z
- 59
- 60 20. Gerotziafas GT, Taher A, Abdel-Razeq H, et al. A Predictive Score for Thrombosis Associated
- with Breast, Colorectal, Lung, or Ovarian Cancer: The Prospective COMPASS-Cancer-
- Associated Thrombosis Study. *Oncologist* 2017;22:1222-31. doi:
- 10.1634/theoncologist.2016-0414

21. Pabinger I, van Es N, Heinze G, Posch F, Riedl J, Reitter EM, Di Nisio M, Cesarman-Maus G, Kraaijpoel N, Zielinski CC, Büller HR & Ay C. . A clinical prediction model for cancer-associated venous thromboembolism: a development and validation study in two independent prospective cohorts. *Lancet Haematol* 2018;5:e289-e98. doi: 10.1016/S2352-3026(18)30063-2
22. Syrigos K, Grapsa D, Sangare R, et al. Prospective Assessment of Clinical Risk Factors and Biomarkers of Hypercoagulability for the Identification of Patients with Lung Adenocarcinoma at Risk for Cancer-Associated Thrombosis: The Observational ROADMAP-CAT Study. *Oncologist* 2018;23:1372-81. doi: 10.1634/theoncologist.2017-0530
23. Yan A-R, Samarawickrema I, Naunton M, et al. Risk Factors and Prediction Models for Venous Thromboembolism in Ambulatory Patients with Lung Cancer. *Healthcare* 2021;9:778. doi: 10.3390/healthcare9060778
24. Ferroni P, Martini F, Portarena I, et al. Novel high-sensitive D-dimer determination predicts chemotherapy-associated venous thromboembolism in intermediate risk lung cancer patients. *Clin lung cancer* 2012;13:482-87. doi: 10.1016/j.clcc.2012.03.005
25. Covidence. (available at <https://www.covidence.org/>).
26. Moons K, de Groot JA, Bouwmeester W, Vergouwe Y, Mallett S, Altman DG, Reitsma JB, Collins GS. Critical appraisal and data extraction for systematic reviews of prediction modelling studies: the CHARMS checklist. *PLoS Med* 2014;11:e1001744. doi: 10.1371/journal.pmed.1001744
27. Blom JW, Doggen CJ, Osanto S, et al. Malignancies, prothrombotic mutations, and the risk of venous thrombosis. *JAMA* 2005;293:715-22. doi: 10.1001/jama.293.6.715
28. Wolff RF, Moons KGM, Riley RD, et al. PROBAST: A Tool to Assess the Risk of Bias and Applicability of Prediction Model Studies. *Ann Intern Med* 2019;170:51-58. doi: 10.7326/M18-1376
29. Page MJ MJ, Bossuyt PM, Boutron I, Hoffmann TC, Mulrow CD, et al. The PRISMA 2020 statement: an updated guideline for reporting systematic reviews. *BMJ* 2021;372:n71. doi: 10.1136/bmj.n71
30. Bornstein M, Hedges LV, Higgins JPT & Rothstein HR. Introduction to Meta-Analysis. Chichester, West Sussex, United Kingdom: Wiley 2009.
31. Egger M, Davey Smith G, Schneider M, Minder C. Bias in meta-analysis detected by a simple, graphical test. *BMJ (Clinical research ed)* 1997;315:629-34.



**Box 1** Inclusion and exclusion criteria

## Inclusion criteria:

- (1) Full-text peer-reviewed journal articles of experimental or observational study types which developed or validated a prognostic model for VTE in adult ambulatory patients with primary lung cancer; and
- (2) Primary lung cancer was diagnosed by histopathology; and
- (3) VTE was confirmed by ultrasonography or computerised tomography or venogram or angiography or magnetic resonance, or consensus by an expert panel; and
- (4) VTE was identified within one year of the diagnosis of primary lung cancer; and
- (5) Published from the inception of databases to Sept 30, 2021; and
- (6) Published in English.

## Exclusion criteria:

- (1) Studies of VTE in patients on chronic (>2 months) antithrombotic or thrombolytic treatment at recruitment or during the follow-up period; or
- (2) Studies of recurrent cancer related VTE; or
- (3) Duplication of the same study; or
- (4) full text unavailable.

**Supplementary Table 1.** Search strategy on MEDLINE, Cochrane Library, CINAHL, Scopus and Web of Science.

| <b>MEDLINE</b> via EBSCOhost, searching MeSH and keywords at all fields                            |                                                                                                                                                                                                                                                                                                                                                                                                                                                                                                                                                              |
|----------------------------------------------------------------------------------------------------|--------------------------------------------------------------------------------------------------------------------------------------------------------------------------------------------------------------------------------------------------------------------------------------------------------------------------------------------------------------------------------------------------------------------------------------------------------------------------------------------------------------------------------------------------------------|
| 1                                                                                                  | (MH "Lung Neoplasms+") OR lung-cancer OR lung-tumor* OR lung-tumour* OR lung-neoplasm* OR lung-adenocarcinoma* OR lung-carcinoma* OR lung-squamous-cell-carcinoma* OR SCLC OR large-cell-neuroendocrine-carcinoma* OR LCNEC OR carcinoid-tumor* OR carcinoid-tumour* OR NSCLC                                                                                                                                                                                                                                                                                |
| 2                                                                                                  | (MH "Venous Thromboembolism") OR (MH "Venous Thrombosis+") OR (MH "Pulmonary Embolism+") OR venous-thrombosis OR thrombotic OR venous-thromboembolism OR thromboembolic OR VTE OR deep-vein-thrombosis OR DVT OR pulmonary-embolism OR PE OR catheter-related-thrombo* OR CRT OR cancer-associated-thrombo* OR CAT                                                                                                                                                                                                                                           |
| 3                                                                                                  | (MH "Health Status Indicators+") OR (MH "Clinical Decision Rules") OR (MH "Risk Assessment+") OR (MH "Models, Statistical+") OR (MH "Multivariate Analysis+") OR (MH "Risk Factors+") OR (MH "Risk+") OR (MH "Predictive Value of Tests") OR (MH "ROC Curve") OR risk-model* OR risk-assessment OR risk-stratification OR risk-predicti* OR risk-scor* OR prediction-model* OR predictive-model* OR predictive-scor* OR prediction-tool* OR scoring-system* OR score-system* OR prognostic-model* OR multivariate-model* OR clinical-rul* OR prediction-rul* |
| 4                                                                                                  | 1 AND 2 AND 3                                                                                                                                                                                                                                                                                                                                                                                                                                                                                                                                                |
| <b>Cochrane Library</b> , searching keywords at All Text                                           |                                                                                                                                                                                                                                                                                                                                                                                                                                                                                                                                                              |
| (MeSH search is not needed, because the results will be the duplicates of MeSH search in MEDLINE.) |                                                                                                                                                                                                                                                                                                                                                                                                                                                                                                                                                              |
| 1                                                                                                  | lung-cancer OR lung-tumor* OR lung-tumour* OR lung-neoplasm* OR lung-adenocarcinoma* OR lung-carcinoma* OR lung-squamous-cell-carcinoma* OR SCLC OR large-cell-neuroendocrine-carcinoma* OR LCNEC OR carcinoid-tumor* OR carcinoid-tumour* OR NSCLC                                                                                                                                                                                                                                                                                                          |
| 2                                                                                                  | venous-thrombosis OR thrombotic OR venous-thromboembolism OR thromboembolic OR VTE OR deep-vein-thrombosis OR DVT OR pulmonary-embolism OR PE OR catheter-related-thrombo* OR CRT OR cancer-associated-thrombo* OR CAT                                                                                                                                                                                                                                                                                                                                       |

|                                                                             |                                                                                                                                                                                                                                                                                                                                                                                                                                                                                                                                                  |
|-----------------------------------------------------------------------------|--------------------------------------------------------------------------------------------------------------------------------------------------------------------------------------------------------------------------------------------------------------------------------------------------------------------------------------------------------------------------------------------------------------------------------------------------------------------------------------------------------------------------------------------------|
| 3                                                                           | risk-model* OR risk-assessment OR risk-stratification OR risk-predicti* OR risk-scor* OR prediction-model* OR predictive-model* OR predictive-scor* OR prediction-tool* OR scoring-system* OR score-system* OR prognostic-model* OR multivariate-model* OR clinical-rul* OR prediction-rul*                                                                                                                                                                                                                                                      |
| 4                                                                           | 1 AND 2 AND 3                                                                                                                                                                                                                                                                                                                                                                                                                                                                                                                                    |
| <b>CINAHL</b> via EBSCOhost, searching CINAHL SH and keywords at all fields |                                                                                                                                                                                                                                                                                                                                                                                                                                                                                                                                                  |
| 1                                                                           | (MH "Lung Neoplasms+") OR lung-cancer OR lung-tumor* OR lung-tumour* OR lung-neoplasm* OR lung-adenocarcinoma* OR lung-carcinoma* OR lung-squamous-cell-carcinoma* OR SCLC OR large-cell-neuroendocrine-carcinoma* OR LCNEC OR carcinoid-tumor* OR carcinoid-tumour* OR NSCLC                                                                                                                                                                                                                                                                    |
| 2                                                                           | (MH "Venous Thromboembolism") OR (MH "Venous Thrombosis+") OR (MH "Catheter-Related Thrombosis") OR (MH "Pulmonary Embolism") OR venous-thrombosis OR thrombotic OR venous-thromboembolism OR thromboembolic OR VTE OR deep-vein-thrombosis OR DVT OR pulmonary-embolism OR PE OR catheter-related-thrombo* OR CRT OR cancer-associated-thrombo* OR CAT                                                                                                                                                                                          |
| 3                                                                           | (MH "Clinical Assessment Tools+") OR (MH "Risk Assessment") OR (MH "Models, Statistical+") OR (MH "ROC Curve") OR (MH "Multivariate Analysis+") OR (MH "Risk Factors+") OR (MH "Predictive Value of Tests") OR (MH "Sensitivity and Specificity") OR risk-model* OR risk-assessment OR risk-stratification OR risk-predicti* OR risk-scor* OR prediction-model* OR predictive-model* OR predictive-scor* OR prediction-tool* OR scoring-system* OR score-system* OR prognostic-model* OR multivariate-model* OR clinical-rul* OR prediction-rul* |
| 4                                                                           | 1 AND 2 AND 3                                                                                                                                                                                                                                                                                                                                                                                                                                                                                                                                    |
| <b>Scopus</b> , searching keywords at Article Title/Abstract/Keywords       |                                                                                                                                                                                                                                                                                                                                                                                                                                                                                                                                                  |
| 1                                                                           | TITLE-ABS-KEY (lung-cancer OR lung-tumor* OR lung-tumour* OR lung-neoplasm* OR lung-adenocarcinoma* OR lung-carcinoma* OR lung-squamous-cell-carcinoma* OR SCLC OR large-cell-neuroendocrine-carcinoma* OR LCNEC OR carcinoid-tumor* OR carcinoid-tumour* OR NSCLC)                                                                                                                                                                                                                                                                              |

|                                                                     |                                                                                                                                                                                                                                                                                                             |
|---------------------------------------------------------------------|-------------------------------------------------------------------------------------------------------------------------------------------------------------------------------------------------------------------------------------------------------------------------------------------------------------|
| 2                                                                   | TITLE-ABS-KEY (venous-thrombosis OR thrombotic OR venous-thromboembolism OR thromboembolic OR VTE OR deep-vein-thrombosis OR DVT OR pulmonary-embolism OR PE OR catheter-related-thrombo* OR CRT OR cancer-associated-thrombo* OR CAT)                                                                      |
| 3                                                                   | TITLE-ABS-KEY (risk-model* OR risk-assessment OR risk-stratification OR risk-predicti* OR risk-scor* OR prediction-model* OR predictive-model* OR predictive-scor* OR prediction-tool* OR scoring-system* OR score-system* OR prognostic-model* OR multivariate-model* OR clinical-rul* OR prediction-rul*) |
| 4                                                                   | 1 AND 2 AND 3                                                                                                                                                                                                                                                                                               |
| <b>Web of Science Core Collection</b> , searching keywords at Topic |                                                                                                                                                                                                                                                                                                             |
| 1                                                                   | lung-cancer OR lung-tumor* OR lung-tumour* OR lung-neoplasm* OR lung-adenocarcinoma* OR lung-carcinoma* OR lung-squamous-cell-carcinoma* OR SCLC OR large-cell-neuroendocrine-carcinoma* OR LCNEC OR carcinoid-tumor* OR carcinoid-tumour* OR NSCLC (Topic)                                                 |
| 2                                                                   | venous-thrombosis OR thrombotic OR venous-thromboembolism OR thromboembolic OR VTE OR deep-vein-thrombosis OR DVT OR pulmonary-embolism OR PE OR catheter-related-thrombo* OR CRT OR cancer-associated-thrombo* OR CAT (Topic)                                                                              |
| 3                                                                   | risk-model* OR risk-assessment OR risk-stratification OR risk-predicti* OR risk-scor* OR prediction-model* OR predictive-model* OR predictive-scor* OR prediction-tool* OR scoring-system* OR score-system* OR prognostic-model* OR multivariate-model* OR clinical-rul* OR prediction-rul* (Topic)         |
| 4                                                                   | 1 AND 2 AND 3                                                                                                                                                                                                                                                                                               |

**Table 1** PRISMA-P (preferred reporting items for systematic review and meta-analysis protocols) 2015 checklist

| Section and topic                 | Item No. | Checklist item                                                                                                                                                                                  | Reported on page No. |
|-----------------------------------|----------|-------------------------------------------------------------------------------------------------------------------------------------------------------------------------------------------------|----------------------|
| <b>Administrative information</b> |          |                                                                                                                                                                                                 |                      |
| Title:                            |          |                                                                                                                                                                                                 |                      |
| Identification                    | 1a       | Identify the report as a protocol of a systematic review                                                                                                                                        | 1                    |
| Update                            | 1b       | If the protocol is for an update of a previous systematic review, identify as such                                                                                                              | NA                   |
| Registration                      | 2        | If registered, provide the name of the registry (such as PROSPERO) and registration number                                                                                                      | 1                    |
| Authors:                          |          |                                                                                                                                                                                                 |                      |
| Contact                           | 3a       | Provide name, institutional affiliation, e-mail address of all protocol authors; provide physical mailing address of corresponding author                                                       | 1                    |
| Contributions                     | 3b       | Describe contributions of protocol authors and identify the guarantor of the review                                                                                                             | 9                    |
| Amendments                        | 4        | If the protocol represents an amendment of a previously completed or published protocol, identify as such and list changes; otherwise, state plan for documenting important protocol amendments | NA                   |
| Support:                          |          |                                                                                                                                                                                                 |                      |
| Sources                           | 5a       | Indicate sources of financial or other support for the review                                                                                                                                   | 9                    |
| Sponsor                           | 5b       | Provide name for the review funder and/or sponsor                                                                                                                                               | NA                   |
| Role of sponsor or funder         | 5c       | Describe roles of funder(s), sponsor(s), and/or institution(s), if any, in developing the protocol                                                                                              | NA                   |
| <b>Introduction</b>               |          |                                                                                                                                                                                                 |                      |
| Rationale                         | 6        | Describe the rationale for the review in the context of what is already known                                                                                                                   | 3-5                  |
| Objectives                        | 7        | Provide an explicit statement of the question(s) the review will address with reference to participants, interventions, comparators, and outcomes (PICO)                                        | 5-6                  |

| Section and topic                  | Item No. | Checklist item                                                                                                                                                                                                                | Reported on page No. |
|------------------------------------|----------|-------------------------------------------------------------------------------------------------------------------------------------------------------------------------------------------------------------------------------|----------------------|
| <b>Methods</b>                     |          |                                                                                                                                                                                                                               |                      |
| Eligibility criteria               | 8        | Specify the study characteristics (such as PICO, study design, setting, time frame) and report characteristics (such as years considered, language, publication status) to be used as criteria for eligibility for the review | 5,6,12               |
| Information sources                | 9        | Describe all intended information sources (such as electronic databases, contact with study authors, trial registers or other grey literature sources) with planned dates of coverage                                         | 6                    |
| Search strategy                    | 10       | Present draft of search strategy to be used for at least one electronic database, including planned limits, such that it could be repeated                                                                                    | Suppl. Table         |
| Study records:                     |          |                                                                                                                                                                                                                               |                      |
| Data management                    | 11a      | Describe the mechanism(s) that will be used to manage records and data throughout the review                                                                                                                                  | 6-7                  |
| Selection process                  | 11b      | State the process that will be used for selecting studies (such as two independent reviewers) through each phase of the review (that is, screening, eligibility, and inclusion in meta-analysis)                              | 6,12                 |
| Data collection process            | 11c      | Describe planned method of extracting data from reports (such as piloting forms, done independently, in duplicate), any processes for obtaining and confirming data from investigators                                        | 7-8                  |
| Data items                         | 12       | List and define all variables for which data will be sought (such as PICO items, funding sources), any pre-planned data assumptions and simplifications                                                                       | 7                    |
| Outcomes and prioritization        | 13       | List and define all outcomes for which data will be sought, including prioritization of main and additional outcomes, with rationale                                                                                          | 6                    |
| Risk of bias in individual studies | 14       | Describe anticipated methods for assessing risk of bias of individual studies, including whether this will be done at the outcome or study level, or both; state how this information will be used in data synthesis          | 7-8                  |

1  
2  
3  
4  
5  
6  
7  
8  
9  
10  
11  
12  
13  
14  
15  
16  
17  
18  
19  
20  
21  
22  
23  
24  
25  
26  
27  
28  
29  
30  
31  
32  
33  
34  
35  
36  
37  
38  
39  
40  
41  
42  
43  
44  
45  
46

| Section and topic                 | Item No. | Checklist item                                                                                                                                                                                                                                   | Reported on page No. |
|-----------------------------------|----------|--------------------------------------------------------------------------------------------------------------------------------------------------------------------------------------------------------------------------------------------------|----------------------|
| Data synthesis                    | 15a      | Describe criteria under which study data will be quantitatively synthesised                                                                                                                                                                      | 8                    |
|                                   | 15b      | If data are appropriate for quantitative synthesis, describe planned summary measures, methods of handling data and methods of combining data from studies, including any planned exploration of consistency (such as $I^2$ , Kendall's $\tau$ ) | 8                    |
|                                   | 15c      | Describe any proposed additional analyses (such as sensitivity or subgroup analyses, meta-regression)                                                                                                                                            | 8                    |
|                                   | 15d      | If quantitative synthesis is not appropriate, describe the type of summary planned                                                                                                                                                               | 8                    |
| Meta-bias(es)                     | 16       | Specify any planned assessment of meta-bias(es) (such as publication bias across studies, selective reporting within studies)                                                                                                                    | 8,9                  |
| Confidence in cumulative evidence | 17       | Describe how the strength of the body of evidence will be assessed (such as GRADE)                                                                                                                                                               | NA                   |

view only
