# Supplementary material for: Models for predicting venous thromboembolism in ambulatory patients with lung cancer: a systematic review protocol
Source: PubMed Central journal article supplement — BMJ Open. 2021 Dec 1;11(12):e055322. doi: 10.1136/bmjopen-2021-055322 (PMC8638451; doi:10.1136/bmjopen-2021-055322), 2021-12-01
Supplement: bmjopen-2021-055322supp001.pdf [file bmjopen-2021-055322supp001.pdf]

**Supplementary Table 1.** Search strategy on MEDLINE, Cochrane Library, CINAHL, Scopus and Web of Science.

| <b>MEDLINE</b> via EBSCOhost, searching MeSH and keywords at all fields                            |                                                                                                                                                                                                                                                                                                                                                                                                                                                                                                                                                              |
|----------------------------------------------------------------------------------------------------|--------------------------------------------------------------------------------------------------------------------------------------------------------------------------------------------------------------------------------------------------------------------------------------------------------------------------------------------------------------------------------------------------------------------------------------------------------------------------------------------------------------------------------------------------------------|
| 1                                                                                                  | (MH "Lung Neoplasms+") OR lung-cancer OR lung-tumor* OR lung-tumour* OR lung-neoplasm* OR lung-adenocarcinoma* OR lung-carcinoma* OR lung-squamous-cell-carcinoma* OR SCLC OR large-cell-neuroendocrine-carcinoma* OR LCNEC OR carcinoid-tumor* OR carcinoid-tumour* OR NSCLC                                                                                                                                                                                                                                                                                |
| 2                                                                                                  | (MH "Venous Thromboembolism") OR (MH "Venous Thrombosis+") OR (MH "Pulmonary Embolism+") OR venous-thrombosis OR thrombotic OR venous-thromboembolism OR thromboembolic OR VTE OR deep-vein-thrombosis OR DVT OR pulmonary-embolism OR PE OR catheter-related-thrombo* OR CRT OR cancer-associated-thrombo* OR CAT                                                                                                                                                                                                                                           |
| 3                                                                                                  | (MH "Health Status Indicators+") OR (MH "Clinical Decision Rules") OR (MH "Risk Assessment+") OR (MH "Models, Statistical+") OR (MH "Multivariate Analysis+") OR (MH "Risk Factors+") OR (MH "Risk+") OR (MH "Predictive Value of Tests") OR (MH "ROC Curve") OR risk-model* OR risk-assessment OR risk-stratification OR risk-predicti* OR risk-scor* OR prediction-model* OR predictive-model* OR predictive-scor* OR prediction-tool* OR scoring-system* OR score-system* OR prognostic-model* OR multivariate-model* OR clinical-rul* OR prediction-rul* |
| 4                                                                                                  | 1 AND 2 AND 3                                                                                                                                                                                                                                                                                                                                                                                                                                                                                                                                                |
| <b>Cochrane Library</b> , searching keywords at All Text                                           |                                                                                                                                                                                                                                                                                                                                                                                                                                                                                                                                                              |
| (MeSH search is not needed, because the results will be the duplicates of MeSH search in MEDLINE.) |                                                                                                                                                                                                                                                                                                                                                                                                                                                                                                                                                              |
| 1                                                                                                  | lung-cancer OR lung-tumor* OR lung-tumour* OR lung-neoplasm* OR lung-adenocarcinoma* OR lung-carcinoma* OR lung-squamous-cell-carcinoma* OR SCLC OR large-cell-neuroendocrine-carcinoma* OR LCNEC OR carcinoid-tumor* OR carcinoid-tumour* OR NSCLC                                                                                                                                                                                                                                                                                                          |
| 2                                                                                                  | venous-thrombosis OR thrombotic OR venous-thromboembolism OR thromboembolic OR VTE OR deep-vein-thrombosis OR DVT OR pulmonary-embolism OR PE OR catheter-related-thrombo* OR CRT OR cancer-associated-thrombo* OR CAT                                                                                                                                                                                                                                                                                                                                       |

|                                                                             |                                                                                                                                                                                                                                                                                                                                                                                                                                                                                                                                                  |
|-----------------------------------------------------------------------------|--------------------------------------------------------------------------------------------------------------------------------------------------------------------------------------------------------------------------------------------------------------------------------------------------------------------------------------------------------------------------------------------------------------------------------------------------------------------------------------------------------------------------------------------------|
| 3                                                                           | risk-model* OR risk-assessment OR risk-stratification OR risk-predicti* OR risk-scor* OR prediction-model* OR predictive-model* OR predictive-scor* OR prediction-tool* OR scoring-system* OR score-system* OR prognostic-model* OR multivariate-model* OR clinical-rul* OR prediction-rul*                                                                                                                                                                                                                                                      |
| 4                                                                           | 1 AND 2 AND 3                                                                                                                                                                                                                                                                                                                                                                                                                                                                                                                                    |
| <b>CINAHL</b> via EBSCOhost, searching CINAHL SH and keywords at all fields |                                                                                                                                                                                                                                                                                                                                                                                                                                                                                                                                                  |
| 1                                                                           | (MH "Lung Neoplasms+") OR lung-cancer OR lung-tumor* OR lung-tumour* OR lung-neoplasm* OR lung-adenocarcinoma* OR lung-carcinoma* OR lung-squamous-cell-carcinoma* OR SCLC OR large-cell-neuroendocrine-carcinoma* OR LCNEC OR carcinoid-tumor* OR carcinoid-tumour* OR NSCLC                                                                                                                                                                                                                                                                    |
| 2                                                                           | (MH "Venous Thromboembolism") OR (MH "Venous Thrombosis+") OR (MH "Catheter-Related Thrombosis") OR (MH "Pulmonary Embolism") OR venous-thrombosis OR thrombotic OR venous-thromboembolism OR thromboembolic OR VTE OR deep-vein-thrombosis OR DVT OR pulmonary-embolism OR PE OR catheter-related-thrombo* OR CRT OR cancer-associated-thrombo* OR CAT                                                                                                                                                                                          |
| 3                                                                           | (MH "Clinical Assessment Tools+") OR (MH "Risk Assessment") OR (MH "Models, Statistical+") OR (MH "ROC Curve") OR (MH "Multivariate Analysis+") OR (MH "Risk Factors+") OR (MH "Predictive Value of Tests") OR (MH "Sensitivity and Specificity") OR risk-model* OR risk-assessment OR risk-stratification OR risk-predicti* OR risk-scor* OR prediction-model* OR predictive-model* OR predictive-scor* OR prediction-tool* OR scoring-system* OR score-system* OR prognostic-model* OR multivariate-model* OR clinical-rul* OR prediction-rul* |
| 4                                                                           | 1 AND 2 AND 3                                                                                                                                                                                                                                                                                                                                                                                                                                                                                                                                    |
| <b>Scopus</b> , searching keywords at Article Title/Abstract/Keywords       |                                                                                                                                                                                                                                                                                                                                                                                                                                                                                                                                                  |
| 1                                                                           | TITLE-ABS-KEY (lung-cancer OR lung-tumor* OR lung-tumour* OR lung-neoplasm* OR lung-adenocarcinoma* OR lung-carcinoma* OR lung-squamous-cell-carcinoma* OR SCLC OR large-cell-neuroendocrine-carcinoma* OR LCNEC OR carcinoid-tumor* OR carcinoid-tumour* OR NSCLC)                                                                                                                                                                                                                                                                              |

|                                                                     |                                                                                                                                                                                                                                                                                                             |
|---------------------------------------------------------------------|-------------------------------------------------------------------------------------------------------------------------------------------------------------------------------------------------------------------------------------------------------------------------------------------------------------|
| 2                                                                   | TITLE-ABS-KEY (venous-thrombosis OR thrombotic OR venous-thromboembolism OR thromboembolic OR VTE OR deep-vein-thrombosis OR DVT OR pulmonary-embolism OR PE OR catheter-related-thrombo* OR CRT OR cancer-associated-thrombo* OR CAT)                                                                      |
| 3                                                                   | TITLE-ABS-KEY (risk-model* OR risk-assessment OR risk-stratification OR risk-predicti* OR risk-scor* OR prediction-model* OR predictive-model* OR predictive-scor* OR prediction-tool* OR scoring-system* OR score-system* OR prognostic-model* OR multivariate-model* OR clinical-rul* OR prediction-rul*) |
| 4                                                                   | 1 AND 2 AND 3                                                                                                                                                                                                                                                                                               |
| <b>Web of Science Core Collection</b> , searching keywords at Topic |                                                                                                                                                                                                                                                                                                             |
| 1                                                                   | lung-cancer OR lung-tumor* OR lung-tumour* OR lung-neoplasm* OR lung-adenocarcinoma* OR lung-carcinoma* OR lung-squamous-cell-carcinoma* OR SCLC OR large-cell-neuroendocrine-carcinoma* OR LCNEC OR carcinoid-tumor* OR carcinoid-tumour* OR NSCLC (Topic)                                                 |
| 2                                                                   | venous-thrombosis OR thrombotic OR venous-thromboembolism OR thromboembolic OR VTE OR deep-vein-thrombosis OR DVT OR pulmonary-embolism OR PE OR catheter-related-thrombo* OR CRT OR cancer-associated-thrombo* OR CAT (Topic)                                                                              |
| 3                                                                   | risk-model* OR risk-assessment OR risk-stratification OR risk-predicti* OR risk-scor* OR prediction-model* OR predictive-model* OR predictive-scor* OR prediction-tool* OR scoring-system* OR score-system* OR prognostic-model* OR multivariate-model* OR clinical-rul* OR prediction-rul* (Topic)         |
| 4                                                                   | 1 AND 2 AND 3                                                                                                                                                                                                                                                                                               |
